# 1 R2DT: computational framework for 2 template-based RNA secondary structure 3 visualisation across non-coding RNA types

4 Blake A. Sweeney<sup>1\*</sup>, David Hoksza<sup>2\*</sup>, Eric P. Nawrocki<sup>3</sup>, Carlos Eduardo Ribas, Fábio Madeira<sup>1</sup>,  
5 Jamie J. Cannone, Robin Gutell<sup>4</sup>, Aparna Maddala, Caeden Meade, Loren Dean Williams,  
6 Anton S. Petrov<sup>5</sup>, Patricia P. Chan, Todd M. Lowe<sup>6</sup>, Robert D. Finn<sup>1,†</sup>, Anton I. Petrov<sup>1,†</sup>

7

8 \* - Joint first authors

9 † - Joint corresponding authors

10

11 <sup>1</sup> European Molecular Biology Laboratory, European Bioinformatics Institute, Wellcome Genome  
12 Campus, Hinxton, Cambridge CB10 1SD, UK

13 <sup>2</sup> Department of Software Engineering, Faculty of Mathematics and Physics, Charles University,  
14 Prague 118 00, Czech Republic

15 <sup>3</sup> National Center for Biotechnology Information; National Institutes of Health; Department of  
16 Health and Human Services; Bethesda, MD 20894, USA

17 <sup>4</sup> Department of Integrative Biology, The University of Texas at Austin, Austin, TX 78712, USA

18 <sup>5</sup> School of Chemistry and Biochemistry, Center for the Origins of Life, Georgia Institute of  
19 Technology, Atlanta GA 30032, USA

20 <sup>6</sup> Department of Biomolecular Engineering, University of California Santa Cruz, CA 95064, USA.

## 21 Abstract

22 Non-coding RNAs (ncRNA) are essential for all life, and the functions of many ncRNAs depend  
23 on their secondary (2D) and tertiary (3D) structure. Despite proliferation of 2D visualisation  
24 software, there is a lack of methods for automatically generating 2D representations in  
25 consistent, reproducible, and recognisable layouts, making them difficult to construct, compare  
26 and analyse. Here we present R2DT, a comprehensive method for visualising a wide range of  
27 RNA structures in standardised layouts. R2DT is based on a library of 3,632 templates  
28 representing the majority of known structured RNAs, from small RNAs to the large subunit  
29 ribosomal RNA. R2DT has been applied to ncRNA sequences from the RNAcentral database  
30 and produced >13 million diagrams, creating the world's largest RNA 2D structure dataset. The  
31 software is freely available at <https://github.com/rnacentral/R2DT> and a web server is found at  
32 <https://rnacentral.org/r2dt>.

## 33 Introduction

34 RNA molecules are key components of a wide range of biological processes, such as  
35 translation, splicing, and transcription. For many RNAs the 3D structure is essential for  
36 biological function. For example, ribosomal RNA (rRNA) and transfer RNA (tRNA) adopt very  
37 specific, evolutionarily conserved 3D conformations in order to perform translation, and RNA  
38 aptamers can specifically recognise small molecules and other ligands by virtue of their 3D  
39 structures. The architecture of structured RNA molecules is hierarchical, whereby the RNA  
40 sequence (primary structure) folds into local elements that, in turn, interact with each other to  
41 form the 3D structure<sup>1</sup>. The majority of intramolecular contacts in most ncRNAs can be  
42 represented in the form of 2D structure diagrams, which are far more accessible and can  
43 present a broader variety of information than the corresponding 3D structures.

44 Many RNAs are visualised following standard, community-accepted conventions. For example,  
45 the 2D diagrams from the Comparative RNA Web Site<sup>2</sup> (CRW) have been used for decades and  
46 are widely accepted as standard for rRNA visualisation. Similarly, tRNAs are traditionally  
47 displayed in a cloverleaf layout with the 5'- and 3'- ends located at the top, the anticodon loop  
48 pointing towards the bottom, and the D- and T- loops facing left and right, respectively<sup>3</sup>. Both of  
49 these representations capture important structural and functional features, providing valuable  
50 insights into the RNA structure and function. However, most of them require manual curation,  
51 which does not scale to the large numbers of sequences being generated by modern molecular  
52 biology techniques.

53 While there are many automated approaches for visualising RNA structure in 2D, they produce  
54 diagrams in non-standard orientations and rely on force-directed layouts (or similar methods)  
55 that can lead to homologous or even identical sequences displayed in completely different  
56 orientations and topologies that are hard to analyse and compare. Examples of such 2D  
57 visualisation tools include VARNA<sup>4</sup>, Forna<sup>5</sup>, RNAView<sup>6</sup>, 3DNA<sup>7</sup>, PseudoViewer<sup>8</sup>, R2R<sup>9</sup>,  
58 RNA2Drawer<sup>10</sup>, as well as 2D structure prediction methods that produce 2D diagrams (for  
59 example, RNAstructure<sup>11</sup>, mfold<sup>12</sup>, and others). None of these methods can produce useful  
60 diagrams for large RNA structures, such as the small and large subunit ribosomal RNAs (SSU  
61 and LSU, respectively), especially when the template and the sequence are of different lengths  
62 (Figure 1). While the SSU-ALIGN software package<sup>13</sup> can generate 2D structure diagrams of  
63 SSU rRNA following the CRW layout, it only displays a fixed number of consensus positions.  
64 The lack of tools for visualising RNAs in consistent, reproducible, and recognisable layouts,  
65 makes comparing RNA structures difficult for RNA biologists and essentially impossible for non-  
66 specialists.

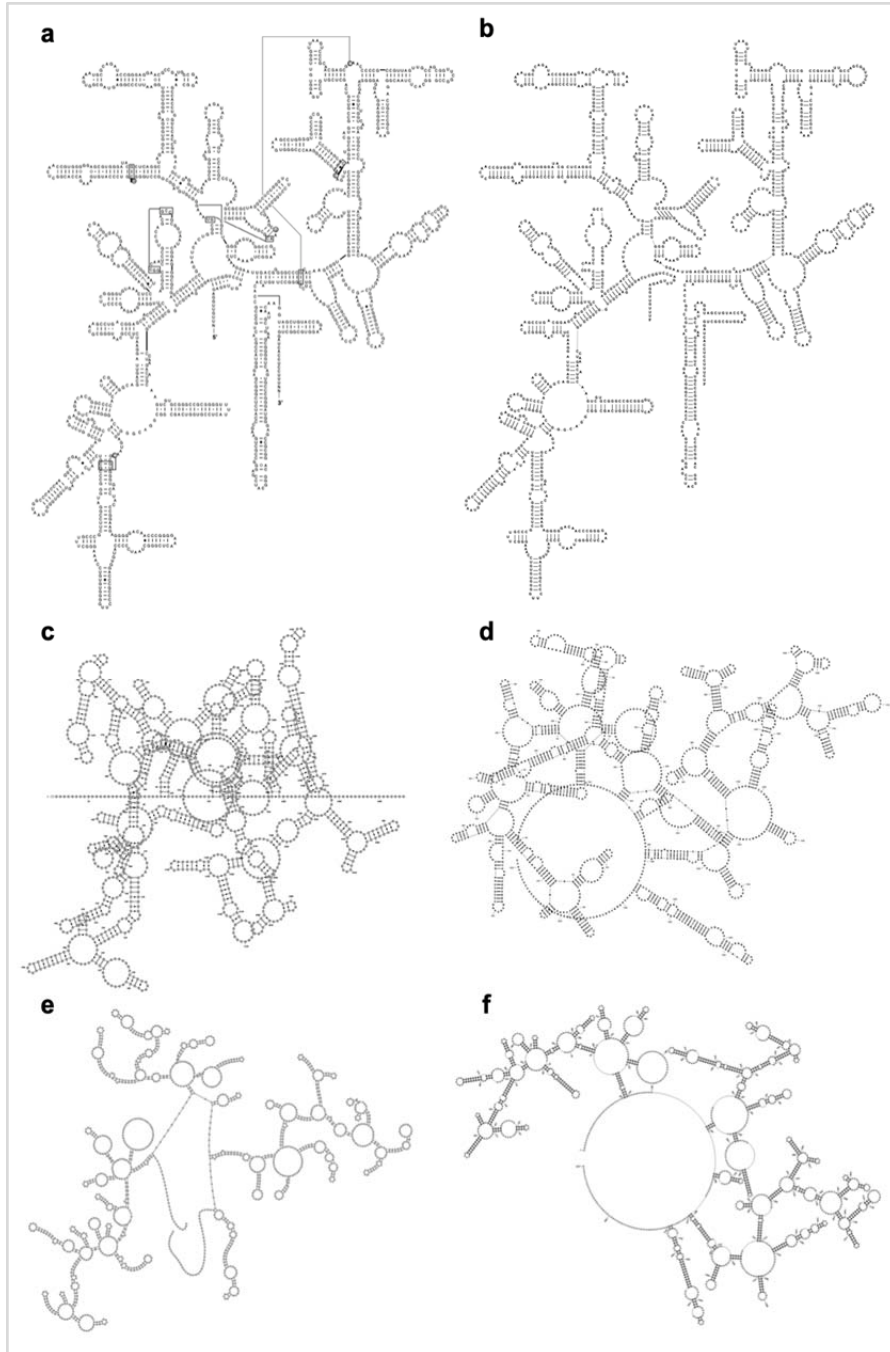

67

68 Figure 1. Examples of 2D structures of the *Thermus thermophilus* SSU rRNA. a) A manually  
69 curated 2D structure from CRW<sup>2</sup>; 2D structures from b) R2DT using the layout from diagram a  
70 as a template; c) Varna<sup>4</sup>; d) Forna<sup>5</sup>; e) RNA2Drawer<sup>10</sup>; f) PseudoViewer<sup>8</sup>. Diagrams b, c, d, e  
71 and f share the same sequence and 2D structure; however, only diagram b reflects the SSU  
72 topography.

73  
74 Here we fill a fundamental gap in visualising structured RNAs by introducing R2DT (RNA 2D  
75 Templates). R2DT encapsulates a comprehensive pipeline for template-based RNA 2D  
76 visualization, generating diagrammatic 2D representations of RNA structures based on a  
77 representative library of templates, and is implemented as both a standalone application  
78 (<https://github.com/rnacentral/R2DT>) and a web server (<https://rnacentral.org/r2dt>). The  
79 framework can be easily updated and extended with new templates, and it has been extensively  
80 tested on >13 million sequences from RNAcentral<sup>14</sup>, a comprehensive database of ncRNA  
81 sequences (see Validation for more information).

## 82 Results

### 83 Automatic pipeline for template selection and 2D structure 84 visualisation

85 We developed a new computational pipeline that uses a template library to define standard  
86 layouts for different types of RNA. A minimal template contains a reference sequence, as well  
87 as cartesian coordinates for each nucleotide, and a 2D representation of the structure in dot-  
88 bracket notation that encapsulates the canonical Watson-Crick base pairs. Some templates also  
89 contain the wobble GU base pairs, but non-canonical base pairs are not currently included in  
90 the templates (see the next section for the detailed description of the template library).  
91 To enable automatic template selection, for each template a covariance model is generated  
92 using Infernal<sup>15</sup> based on the reference sequence and its 2D structure. The R2DT pipeline  
93 includes four steps shown in Figure 2.

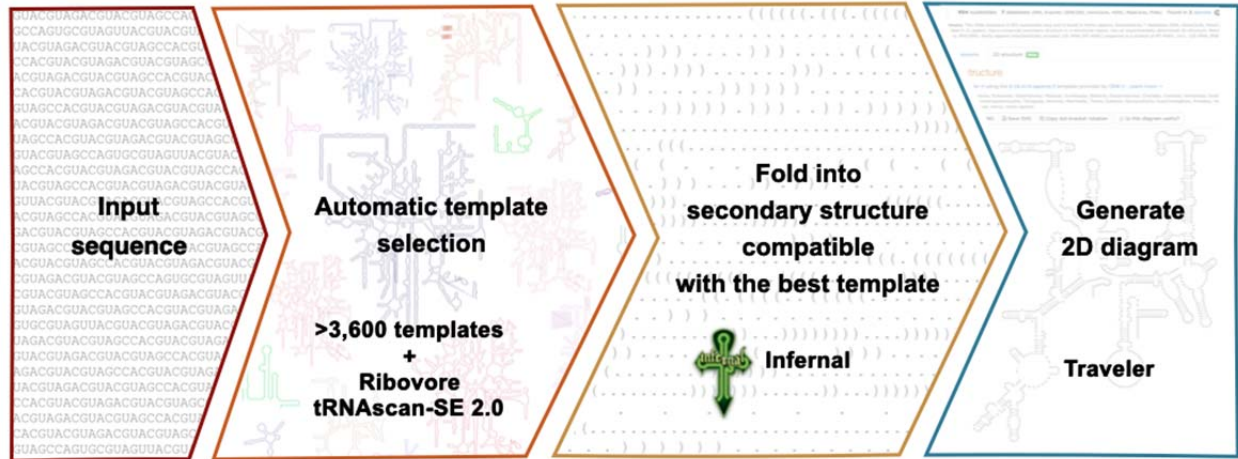

94

95 Figure 2. Summary of the R2DT pipeline. An input sequence is compared to a library of  
96 covariance models representing 2D structure templates using Ribovore and tRNAscan-SE 2.0.  
97 The top-scoring template is used to fold the input sequence into a 2D structure of the best  
98 template. Finally, the input sequence, its predicted 2D structure, and the template are used by  
99 the Traveler software to generate the output 2D diagram.

100

101 1. For each input sequence, the top scoring covariance model is selected using the  
102 *ribotyper.pl* program in the Ribovore software package (version 0.40)  
103 (<https://github.com/nawrockie/ribovore>). For model selection, *ribotyper.pl* runs the  
104 Infernal<sup>15</sup> cmsearch program and uses a profile HMM derived from the covariance model  
105 that scores sequence only and ignores secondary structure to limit running time. If  
106 Ribovore does not find any matches, tRNAscan-SE 2.0<sup>16</sup> is used to search query  
107 sequences against the tRNA models.

108 To speed up template selection, the library is divided into several subsets which are  
109 processed separately (Rfam, LSU and SSU RiboVision rRNAs, CRW, and tRNA  
110 templates). If a sequence is classified to a template model in one of the subsets (defined  
111 as being designated "PASS" by *ribotyper.pl* without a "MultipleHits" flag) then the  
112 remaining subsets are not searched. In cases where both a 3D-based and a covariation-

113 based template are available for the same RNA, the 3D-based template is preferentially  
114 selected.

115 The Ribovore software is used to search against all models except for tRNA. If no hits  
116 are detected, tRNAscan-SE 2.0 is then used to compare the sequences against the  
117 bacterial, archaeal, and eukaryotic domain-specific tRNA models. Once a top scoring  
118 domain-specific tRNA model is chosen, the sequence is compared with the isotype-  
119 specific tRNA models for that domain.

120 2. The input sequence is folded with the Infernal calign program using the top scoring  
121 covariance model. This ensures that the predicted 2D structure is compatible with the  
122 template 2D structure. It is important to note that R2DT does not attempt to fold the  
123 unstructured regions found in some templates or predict the structure of the insertions  
124 relative to the template.

125 3. The 2D structure and the automatically selected template are used by the Traveler  
126 software<sup>17</sup> to generate a 2D structure diagram (see examples in Figure 3).

127 The 2D structure of the input sequence is predicted using Infernal based on the template  
128 covariance model, so the template serves both as a source of coordinates for nucleotides when  
129 positioned on the diagram and a source of base pairing information. The input sequence is not  
130 required to closely match the template, as insertions and deletions can be accommodated, and  
131 nucleotides can be repositioned depending on the structural context by the Traveler software<sup>17</sup>.

132

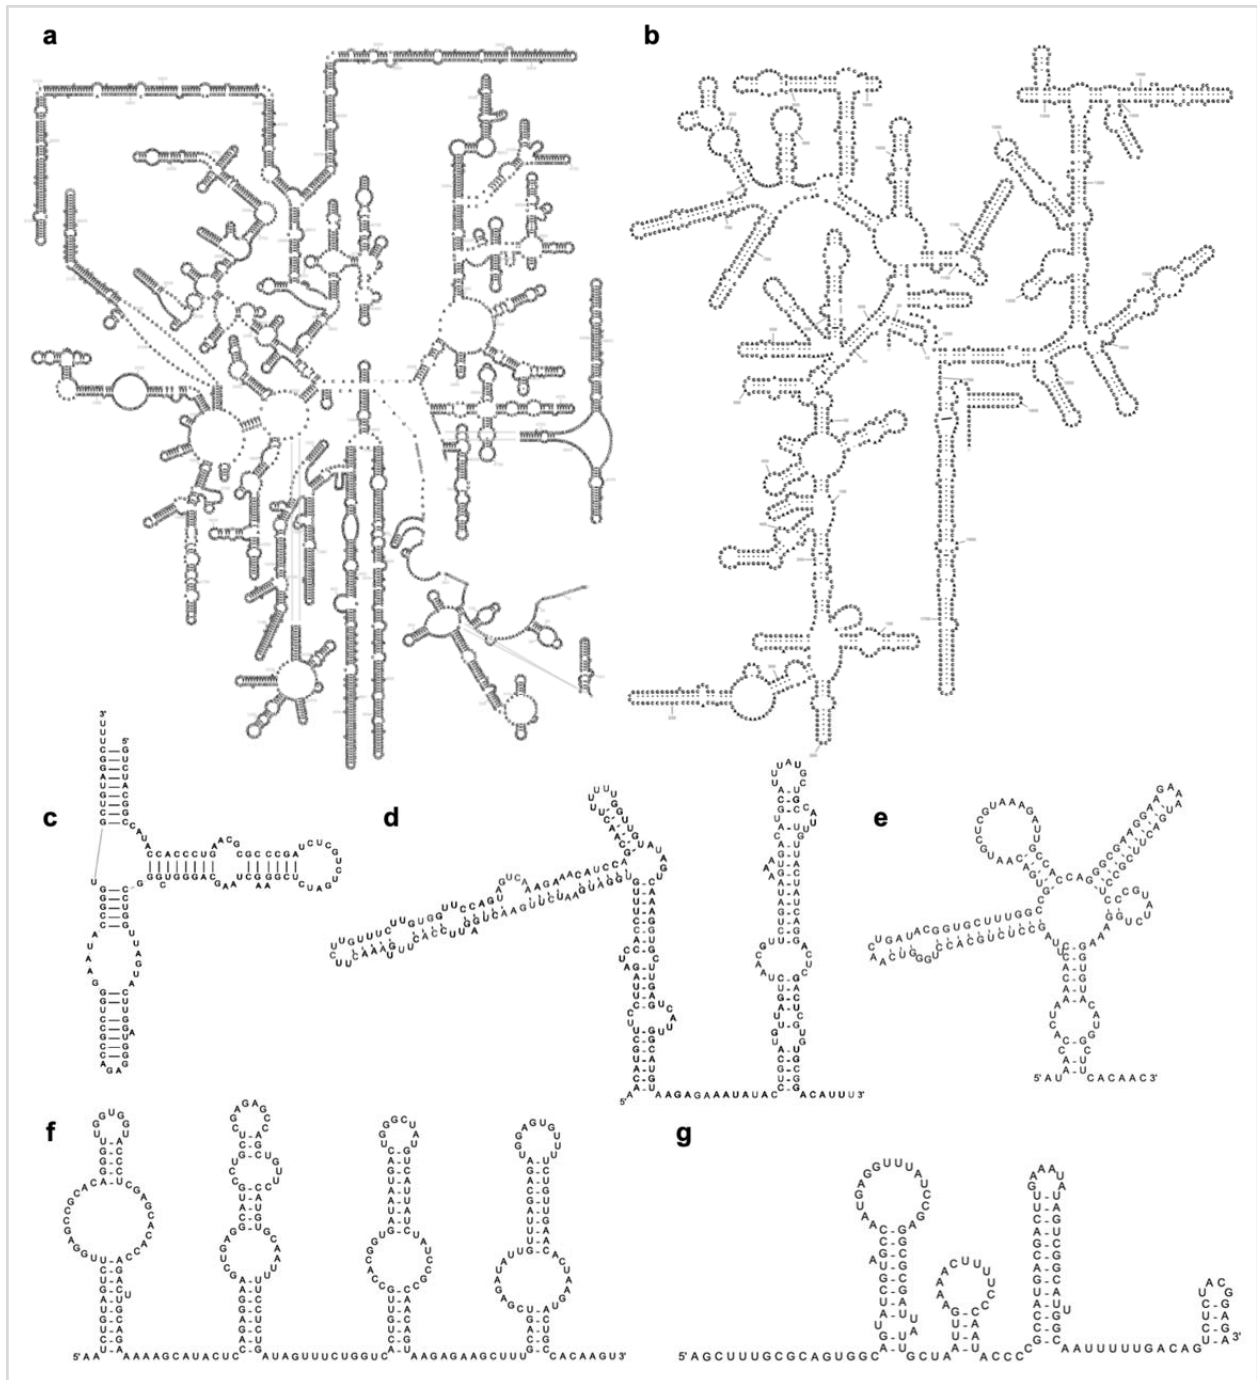

133 Figure 3. Example RNA 2D structures generated by R2DT. a) Cytoplasmic LSU rRNA; b)  
 134 cytoplasmic SSU rRNA; c) 5S rRNA; d) SNORA53 RNA; e) MoCo riboswitch; f) SCARNA13  
 135 RNA; g) U4 snRNA. All diagrams are for human RNAs, except for diagram e showing an  
 136 *Escherichia coli* riboswitch.  
 137



138 For each sequence, the pipeline produces a text file with the 2D structure in dot-bracket notation  
139 and a 2D diagram in SVG format. The diagrams are coloured depending on the identity of the  
140 individual nucleotides in the input sequence relative to the template. Identical nucleotides are  
141 shown in black, while inserted nucleotides are displayed in red. If a nucleotide is modified  
142 compared to the template reference sequence, it is shown in green. If the location of the  
143 nucleotides was automatically repositioned relative to its corresponding position in the template,  
144 the nucleotide is coloured blue.

145 The SVG diagrams can be scaled to any resolution and edited using text editors or specialised  
146 vector graphics editing software. When viewed with a web browser, additional information is  
147 shown when hovering the mouse over individual nucleotides (for example, hovering over  
148 modified nucleotides reveals the identity of the nucleotide in the corresponding position of the  
149 reference sequence). Further interactivity can be added to the SVG visualisations using  
150 JavaScript and CSS web technologies.

## 151 Comprehensive 2D structure template library

152 We compiled a library of 3,632 templates aggregating RNA 2D structure layouts from different  
153 sources (Table 1) in order to represent the diversity of RNA structures ranging from <100  
154 nucleotides (tRNA) to >5,000 nucleotides (human large subunit ribosomal RNA). Templates can  
155 be annotated with additional metadata about the RNAs, such as a taxonomic distribution or  
156 subcellular localisation, as well as per-nucleotide annotations that can be transferred to the  
157 corresponding nucleotides of the input sequence (for example, tRNA nucleotide numbering  
158 using the Sprinzl scheme<sup>18</sup>).

159

160

161 Table 1. The RNA 2D structure template library (manually curated templates developed  
162 specifically for this project are marked with an asterisk).

| RNA type   | Template source         | Number of templates | Manually curated? |
|------------|-------------------------|---------------------|-------------------|
| SSU rRNA   | CRW (covariation-based) | 654                 | Yes               |
|            | RiboVision (3D-based)   | 8*                  | Yes               |
| LSU rRNA   | RiboVision              | 21*                 | Yes               |
| 5S rRNA    | CRW                     | 200                 | Yes               |
| tRNA       | GtRNAdb                 | 74*                 | Yes               |
| Small RNAs | Rfam                    | 2,675               | No                |
|            |                         | Total: 3,632        |                   |

163  
164 While the majority of the 3,632 templates were integrated from the existing sources (Table 1),  
165 103 templates have been manually curated specifically for this project, as described below (also  
166 see Supplementary Table 1).

### 167 New 3D structure based templates model rRNA expansion segments

168 The availability of the experimentally determined ribosomal 3D structures enabled us to improve  
169 the traditional rRNA diagrams available from the CRW<sup>2,19</sup>. Specifically, the 3D structural data  
170 assessed the accuracy of the covariation-based 16S and 23S rRNA secondary structures,  
171 removed the few incorrect base pairs, added new base pairs with both Watson-Crick and non-  
172 canonical base pair conformations, and provided detailed modelling of the species-specific  
173 expansion segments that were not present in the covariation-based expansion segments. The

174 revised LSU 2D templates are outlined using single page layouts and explicitly depict H26a<sup>20</sup>, a  
175 helix that connects the 5' and 3' halves of the LSU rRNA. This irregular helix, which is now  
176 known to be the loop-E motif<sup>21</sup> was initially suggested by Gutell and Fox<sup>22</sup>, and had been  
177 indicated by arrows connecting the two halves of the historical LSU rRNA layouts<sup>23</sup>. All non-  
178 canonical interactions were explicitly depicted when the first 3D structural model of the LSU  
179 particle became available<sup>24</sup>. The single page LSU layouts enable R2DT to visualise the LSU 2D  
180 structures automatically, which has not been possible until now (Figure 4a). For the SSU rRNA,  
181 the updated 2D structures use a more accurate representation of the central pseudoknot,  
182 reflecting the existence of the base triplexes. In addition, the 3D structures allowed us to  
183 visualise the structure of the species-specific eukaryotic expansions<sup>25,26</sup> that could not be  
184 modeled using covariation analysis alone (Figure 4b).

185

186

187

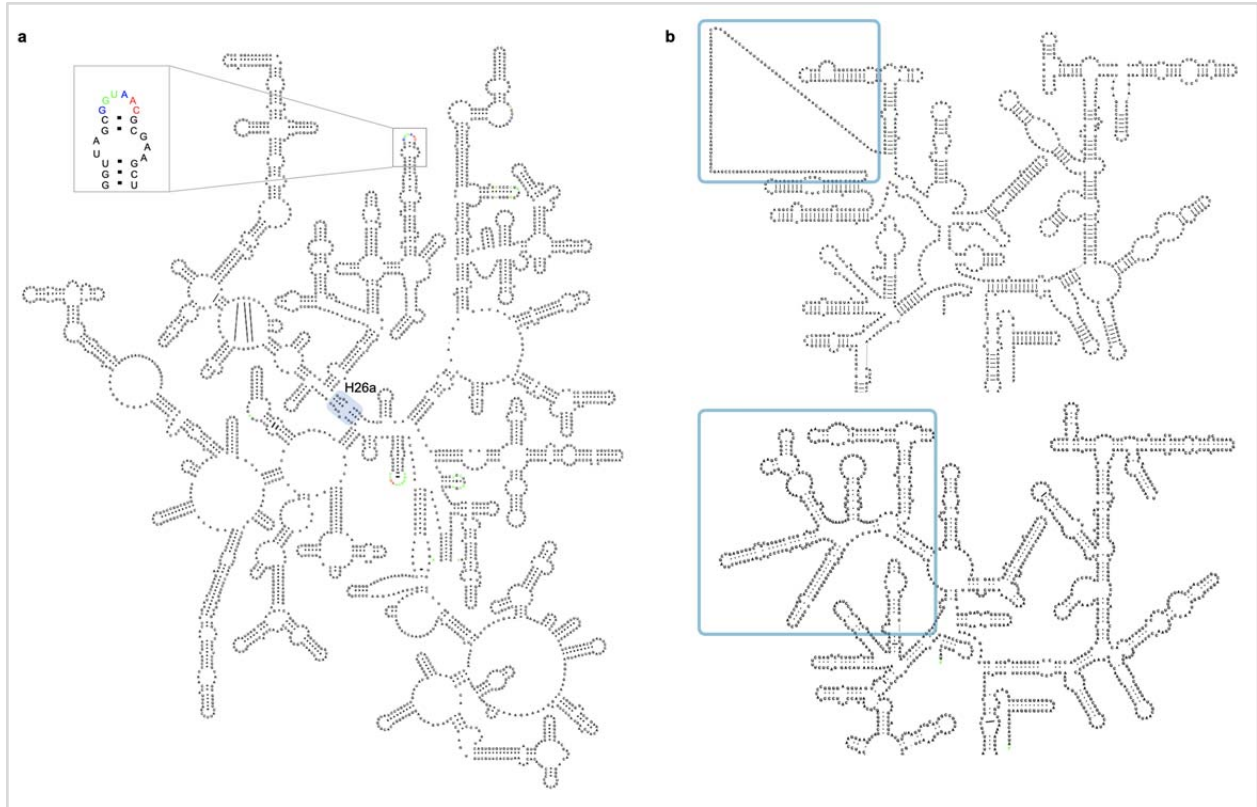

188

189 Figure 4. Example of 3D structure-based rRNA templates. a) An *Escherichia coli* LSU rRNA is  
190 displayed by R2DT using a single-page layout. Helix 26a is highlighted with a blue box. An inset  
191 shows a zoomed in fragment with nucleotides that are identical between the template and the  
192 sequence shown in black, insertions shown in red, and nucleotides that are different between  
193 the template and the sequence shown in green. b) A fragment of a covariation-based human  
194 SSU rRNA layout based on the CRW template (top) and the revised, 3D structure based  
195 template showing additional base pairing interactions (bottom). The species-specific region is  
196 highlighted in blue.

197

198 The resulting rRNA structures are up-to-date, consistent with the 3D structures, and broadly  
199 sample the phylogenetic tree (the templates are listed in Supplementary Table 1). Both LSU and  
200 SSU layouts are generalizable to accommodate numerous expansions that exist in eukaryotic  
201 species.

## 202 Isotype-specific tRNA templates represent the diversity of cytosolic tRNA 203 structures

204 Although cytosolic tRNAs are generally known to have a cloverleaf 2D structure, different  
205 isotypes (the tRNA families inserting different amino acids) have distinct “identity elements”  
206 recognized by specific aminoacyl tRNA synthetases for charging the tRNAs with the proper  
207 amino acids. In addition to the tRNA anticodon that binds with the mRNA codon during  
208 translation, these identity elements include discriminatory nucleotides and base pairs throughout  
209 the tRNA sequences and vary across the domains of life<sup>27</sup>. To better represent the tRNA  
210 structures, we prepared 68 isotype-specific templates for bacterial, archaeal, and eukaryotic  
211 tRNAs that include those decoding the standard twenty amino acids, initiator methionine/N-  
212 formylmethionine (tRNA<sup>iMet</sup> in archaea/eukaryotes or tRNA<sup>fMet</sup> in bacteria), isoleucine for the  
213 AUA codon in bacteria and archaea, and selenocysteine (Figure 5). Consensus tRNA primary  
214 sequence with 2D structure for each isotype of each taxonomic domain was generated based  
215 on the tRNA alignments used for building the isotype-specific covariance models in tRNAscan-  
216 SE 2.0<sup>16</sup>. The isotype-specific tRNA 2D structure templates were created using the  
217 corresponding consensus sequences and structures. In addition, we generated six domain-  
218 specific templates for more general application. Due to the structural difference of variable loop  
219 in type I and type II tRNAs<sup>28</sup>, alignments for building the domain-specific covariance models in  
220 tRNAscan-SE 2.0<sup>16</sup> were divided into two sets. Similar to the isotype-specific ones, the domain-  
221 specific templates were built with the consensus sequences and structures for both type  
222 categories of tRNAs. Together, the isotype-specific templates can be used to visualise 2D  
223 structures of tRNAs with typical features while the domain-specific templates can be applied for  
224 the atypical predictions with undetermined or inconsistent isotypes.

225

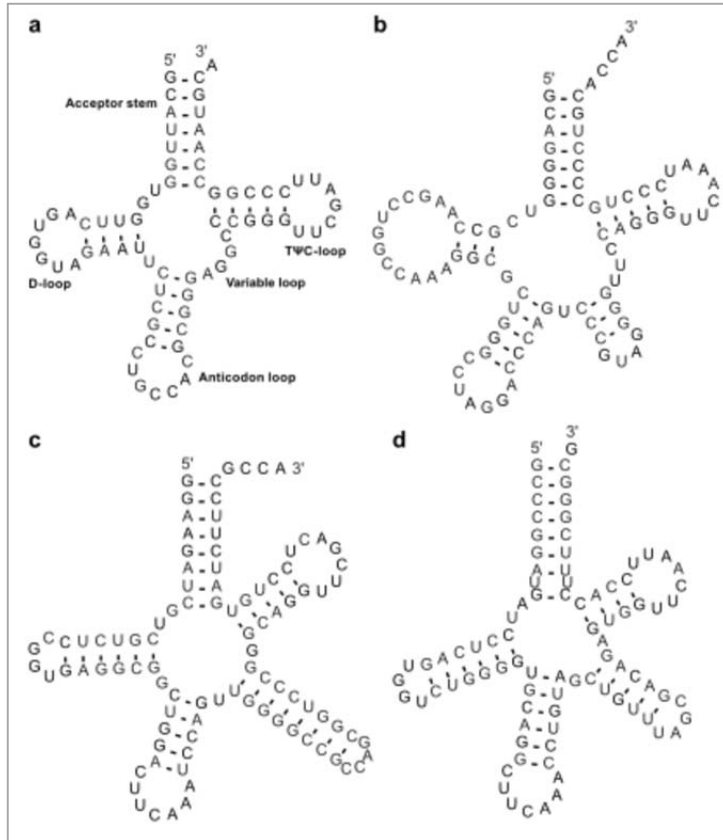

226

227 Figure 5. Examples of tRNA 2D structure visualisations generated by R2DT. a) Human tRNA-  
228 Gly-GCC-2 is an eukaryotic type I tRNA. b) *Methanocaldococcus jannaschii* tRNA-Leu-TAG-1 is  
229 an archaeal type II tRNA. c) *Escherichia coli* K-12 tRNA-SeC-TCA-1 is a bacterial  
230 selenocysteine tRNA with an 8/5 fold<sup>29</sup>. d) Mouse tRNA-SeC-TCA-1 is an eukaryotic  
231 selenocysteine tRNA with a 9/4 fold<sup>30</sup>.

## 232 Community expansion of the 2D template library

233 The R2DT pipeline is designed to be extendable as new templates are added to the library.

234 Notably, R2DT can also serve as a tool for the development of new templates where the R2DT  
235 output is used as a starting point for manual refinement of the 2D layouts. To facilitate the  
236 workflow, we provide a modified version of the XRNA software<sup>31</sup> called XRNA-GT that supports  
237 the import of the R2DT-generated SVG files and can be used to adjust the 2D layouts (for  
238 example, change the orientation of RNA helices or edit base pairs). Using XRNA-GT it is also

239 possible to add custom annotations, such as helix or nucleotide numbers, in order to produce  
240 publication-ready images. The updated 2D layouts can be submitted to the R2DT library where  
241 they become new templates, upon review by the R2DT team. This workflow has been  
242 successfully used internally to produce the 3D-based SSU templates. We welcome new  
243 contributions from the community and provide detailed documentation on GitHub  
244 (<https://github.com/RNAcentral/R2DT#how-to-add-new-templates>).

## 245 Validation of 2D diagrams

246 At the time of writing, there are no alternative methods that enable template-based RNA 2D  
247 structure visualisation at a comparable scale. The only related method, implemented in  
248 rPredictorDB<sup>32</sup>, has a small number of templates (56 as of July 2020) and a limited support for  
249 alternative templates from the same RNA type (for example, species-specific rRNA templates).  
250 As this is a unique dataset, we developed global benchmarks to assess both accuracy of the  
251 template selection and the quality of the resulting 2D diagrams.

## 252 Evaluation of template selection

253 We tested R2DT with a diverse set of rRNA sequences to evaluate the template selection  
254 process, focusing on the rRNA templates as they are annotated at the species level, making it  
255 possible to compare the taxonomic lineages of the input sequence and the template. We  
256 selected all rRNA sequences from RefSeq<sup>33</sup> shorter than 10,000 nucleotides (23,843 sequences  
257 as of July 2020). The sequences were visualised with R2DT and the taxonomic trees of the  
258 sequences and the selected templates were compared by identifying the most specific  
259 taxonomic rank common to the templates and the RefSeq sequences. For example, if an rRNA  
260 from *Photorhabdus caribbeanensis* was drawn using a template from *Escherichia coli*, their  
261 respective phylogenies share the order *Enterobacteriales*, thus the sequence and the template  
262 agree at the level of order. The majority of sequences match the templates at the level of

263 kingdom (55.5%), phylum (20.0%), or class (16.1%) (Supplementary Table 2), indicating that  
264 the selected templates can be taxonomically distant from the input sequences. This effect is due  
265 to the preferential use of the 3D-based SSU and LSU rRNA templates, as only a relatively small  
266 number of 3D structures is available. However, when we classified each nucleotide in the 2D  
267 diagrams based on whether it matched a template for each taxonomic rank separately, we  
268 found that at least 94% of all nucleotides were in the same position as the template for all  
269 taxonomic ranks, confirming that the sequences closely matched the selected templates despite  
270 the phylogenetic distance between the template and sequence.

## 271 R2DT templates model the conserved core of most structured RNAs

272 We evaluated R2DT performance on a set of *bona fide* ncRNA sequences by analysing 6,559  
273 ncRNAs from nine Model Organism Databases and other curated resources, including  
274 DictyBase<sup>34</sup>, FlyBase<sup>35</sup>, MGI<sup>36</sup>, PomBase<sup>37</sup>, SGD<sup>38</sup>, TAIR<sup>39</sup>, WormBase<sup>40</sup>, HGNC<sup>41</sup> and  
275 EcoCyc<sup>42</sup>. These sequences represent a wide taxonomic distribution, including bacteria  
276 (*Escherichia coli*), fungi (*Saccharomyces cerevisiae* and *Schizosaccharomyces pombe*), lower  
277 eukaryotes (*Dictyostelium discoideum*), plants (*Arabidopsis thaliana*), as well as other  
278 organisms of general interest, such as fly, worm, mouse, and human. R2DT generated 2D  
279 diagrams for the majority of the selected sequences (5,663 diagrams or 86.3%), consistent with  
280 the RNA type (rRNA, tRNA, snRNA, snoRNA, SRP RNA) and length (25-10,000 nucleotides) of  
281 the sequence dataset.

282 We classified each nucleotide in the resulting diagrams according to whether it matched a  
283 template and found that 90.6% of nucleotides were displayed using the nucleotide locations  
284 encoded in the templates, while 6.0% of nucleotides represented insertions compared to the  
285 templates, and 3.4% of nucleotides matched the templates but required automatic repositioning  
286 by the Traveler software (Table 2). Overall 94.0% of the nucleotides were visualised using the  
287 template coordinates, indicating that the diagram layouts are similar to the corresponding



288 templates. To further confirm the agreement between the templates and the diagrams, we  
289 manually inspected 1,043 2D diagrams from human and *E. coli* (based on the HGNC and  
290 EcoCyC sequences) to identify any modes of failure, such as overlapping structural regions.  
291 This process identified only 24 suboptimal diagrams (2.3%) that were characterised by  
292 overlapping helices and other artifacts (all diagrams can be seen in Supplementary Information),  
293 while the remaining 1,019 (97.7%) diagrams produced error free diagrams, indicating a close  
294 correspondence between the template and rendered sequence.

295 To eliminate bias from the use of model organisms (which tend to have the most experimental  
296 data), and to also demonstrate the scalability of R2DT, the nucleotide classification analysis was  
297 extended to a broad range of sequences from a wide taxonomic distribution by processing all  
298 ncRNA sequences from RNAcentral, aiming to test as many realistic use cases as possible. As  
299 of release 15 RNAcentral contained 16,107,505 sequences from 896,307 NCBI taxonomic  
300 identifiers including ncRNA types not represented by the R2DT template library, such as  
301 lncRNA or piRNA, as well as partial sequences. R2DT generated 13,384,186 2D diagrams  
302 (83.1% of the total sequences or 87% of all sequences expected to have a 2D diagram), which  
303 can be explored at <https://rnacentral.org>. Similar to the previous case, 94.7% of nucleotides  
304 were drawn in the same position as the templates, while 5.3% were inserted or required  
305 recalculation of the 2D layout (Table 2) suggesting that the R2DT template library  
306 comprehensively captures the conserved core of most structured RNAs and is suitable for  
307 visualising diverse RNA sequences. The agreement between the templates demonstrated in  
308 large scale testing on a diverse set sequences from RNAcentral and other sources indicates the  
309 broad applicability of R2DT for visualising structured RNAs.

310

311

312 Table 2: Analysing the similarity between the R2DT diagrams and the templates. The counts  
 313 indicate the number of nucleotides across all diagrams that match that class, while the  
 314 percentages indicate the fraction of total displayed nucleotides.

| Data source             | Number of nucleotides positioned exactly as in template | Number of nucleotides inserted compared to template | Number of nucleotides requiring repositioning | Total number of displayed nucleotides | Number of sequences | Number of diagrams |
|-------------------------|---------------------------------------------------------|-----------------------------------------------------|-----------------------------------------------|---------------------------------------|---------------------|--------------------|
| DictyBase               | 9,497 (83.1%)                                           | 1,188 (10.4%)                                       | 746 (6.5%)                                    | 11,431                                | 148                 | 123                |
| FlyBase                 | 35,876 (92.6%)                                          | 1,485 (3.8%)                                        | 184 (.5%)                                     | 38,752                                | 458                 | 236                |
| MGI                     | 348,088 (91.6%)                                         | 19,936 (5.2%)                                       | 12,111 (3.2%)                                 | 380,135                               | 3,166               | 3,085              |
| PomBase                 | 21,498 (85.9%)                                          | 2,660 (10.6%)                                       | 878 (3.5%)                                    | 25,036                                | 191                 | 156                |
| SGD                     | 26,325 (89.2%)                                          | 2,433 (8.2%)                                        | 746 (2.5%)                                    | 29,504                                | 188                 | 161                |
| TAIR                    | 46,925 (86.7%)                                          | 3,160 (5.8%)                                        | 4,057 (7.5%)                                  | 54,142                                | 623                 | 483                |
| WormBase                | 35,510 (91.7%)                                          | 1,614 (4.2%)                                        | 1,610 (4.2%)                                  | 38,734                                | 639                 | 376                |
| HGNC                    | 135,021 (94.9%)                                         | 2,639 (1.9%)                                        | 4,685 (3.3%)                                  | 142,345                               | 972                 | 869                |
| EcoCyc                  | 44,913 (97.%)                                           | 1,036 (2.2%)                                        | 367 (.8%)                                     | 46,316                                | 174                 | 174                |
| <b>Total</b>            | <b>703,653 (91.8%)</b>                                  | <b>36,151 (4.7%)</b>                                | <b>25,384 (3.3%)</b>                          | <b>766,395</b>                        | <b>6,559</b>        | <b>5,663</b>       |
| <b>RNAcentral total</b> | 9,038,893,528 (94.7%)                                   | 261,968,286 (2.7%)                                  | 241,927,491 (2.5%)                            | 9,542,789,305                         | 16,107,505          | 13,384,186         |

315

## 316 Discussion

317 We present a comprehensive framework for the ongoing development of consistent,  
318 standardised visualisations of RNA 2D structures. As new 2D structure templates are  
319 introduced, the pipeline can be extended to cover new RNA types, including structured viral  
320 RNAs. For example, as the Coronavirus-specific RNA families were added to the Rfam  
321 database in response to the COVID-19 pandemic<sup>43</sup>, their 2D structures were included in the  
322 template library to enable consistent visualisation of SARS-CoV-2 structured RNAs (Figure 6),  
323 such as the 5' and 3' UTRs and frameshifting signal (Rfam accessions RF03120, RF03125, and  
324 RF00507, respectively).

325 The 2D structure diagrams produced by the pipeline represent computational predictions.  
326 However, they are based on the accumulated knowledge about the RNA families, as many  
327 templates have been curated by experts based on experimental data. The software enables  
328 comparative visualisation, as the diagrams encode the alignment of a given sequence to its  
329 computational model. For example, the diagrams can highlight the structural context of single  
330 nucleotide polymorphisms (SNPs) or demonstrate how a member of an Rfam family deviates  
331 from the consensus 2D structure (Figure 6).

332

333

334

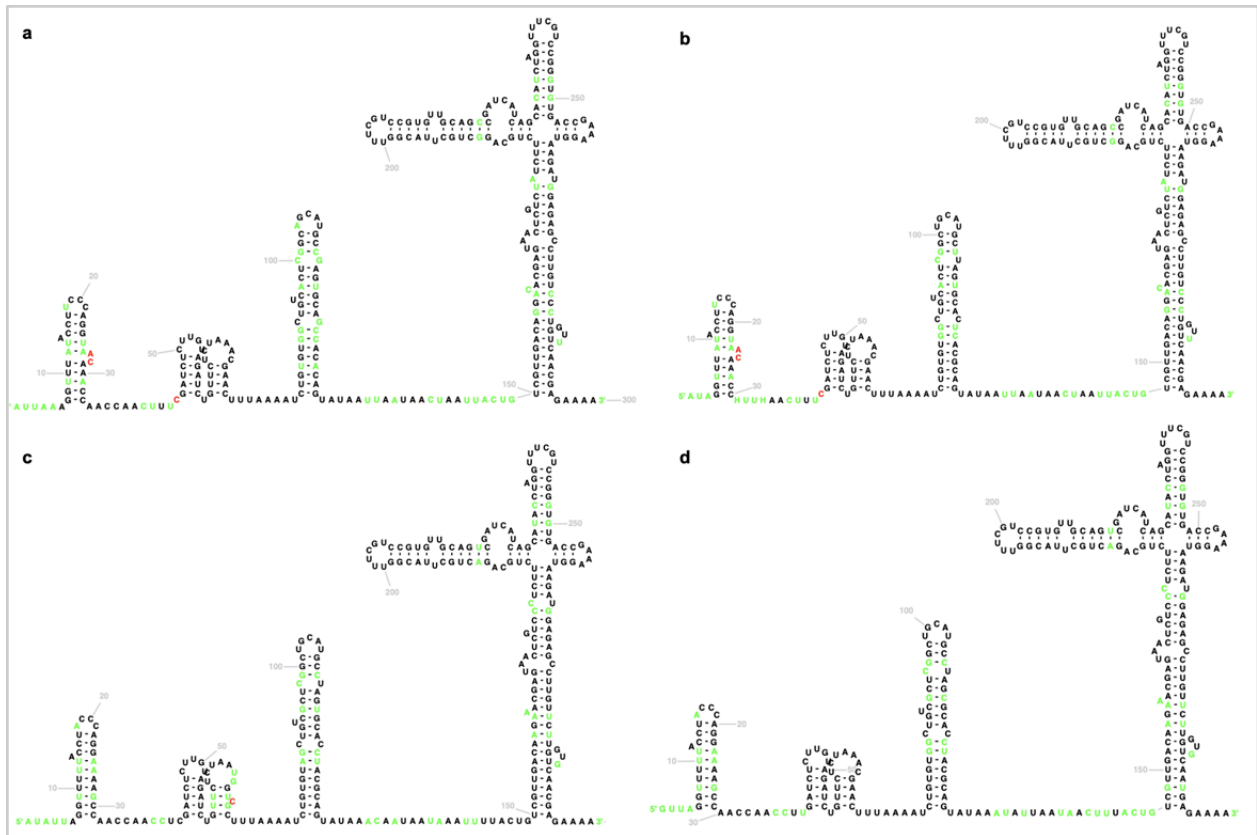

335  
336 Figure 6. Coronavirus 5' UTR 2D structures displayed using the Sarbecovirus Rfam family  
337 (RF03120). a and b) SARS-CoV-2 isolates (MT019530.1 and MT263421. c) SARS Coronavirus  
338 Urbani isolate (MK062184.1); d) Bat SARS Coronavirus HKU3-1 (DQ022305.2). The  
339 standardised 2D layouts facilitate structure comparison, with colour coding highlighting the  
340 differences between individual sequences and the model. Nucleotides in black are identical to  
341 the Rfam consensus sequence and the template, nucleotides shown in green are different  
342 between the input sequence and the template, while red nucleotides represent insertions.  
343  
344 While every effort has been made to ensure comprehensive coverage of ncRNA space and the  
345 usefulness of the resulting visualisations, R2DT still has some limitations. For example, R2DT  
346 cannot generate a diagram if the library does not have a corresponding template or if a  
347 sequence matches multiple consecutive templates. In addition, while partial sequences or

348 insertions can be accommodated, some insertions may result in poor visualisations depending  
349 on their size and the structural context in which they occur in the template.

350 R2DT establishes a framework that can be further extended and refined. Importantly, R2DT can  
351 be used to generate starting versions of new templates that can be manually refined and  
352 incorporated into the template library. For example, new rRNA sequences can be submitted to  
353 R2DT, the species-specific expansion segment regions can be manually edited, and the  
354 resulting diagram can be submitted to R2DT as described above.

355 In addition, we identified two areas for future development and improvements: 1) Expanding and  
356 refining the template library. As new detailed 2D structures are published, we will integrate them  
357 as templates into the R2DT library. In addition, R2DT will benefit from the ongoing development  
358 of the Rfam database as new families are included and additional structural features are  
359 annotated in the existing families. 2) Propagating metadata from the templates to the output  
360 diagrams. Additional metadata would enable efficient navigation of the 2D structures using the  
361 standard numbering schemes for individual nucleotides or structural elements, such as helices  
362 and loops (for example, in the ribosomal RNAs many structural elements have traditionally  
363 assigned numbers, for example, the A-site is located in helix 44). In addition, the Traveler  
364 software already supports pseudoknot visualisation and metadata transfer from the template to  
365 the 2D diagrams. These and other improvements will be released on an ongoing basis in the  
366 future versions of R2DT. We welcome community feedback and contributions at  
367 <https://github.com/rnacentral/R2DT/issues>.

## 368 Methods

### 369 Constructing the RNA template library

#### 370 Covariation-based SSU templates

371 The SSU and 5S rRNA templates were downloaded from the new CRW Site<sup>2</sup> ([http://crw-](http://crw-site.chemistry.gatech.edu/)  
372 [site.chemistry.gatech.edu/](http://crw-site.chemistry.gatech.edu/)). The 2D structures and templates are based on the comparative  
373 analysis of manually curated multiple sequence alignments and are supported by covariation of  
374 the interacting base pairs<sup>44</sup>. The 2D structure model diagrams were generated with the Sun  
375 Solaris-based version of XRNA<sup>45</sup>, manually edited, and written out as both PostScript and PDF  
376 files. The R2DT templates have been created based on the CRW bpseq files with the sequence  
377 and the 2D structure information, and the PostScript files specifying the position of each  
378 nucleotide.

#### 379 3D structure-based LSU and SSU templates

380 Both LSU and SSU templates have been created using XRNA-GT, an in-house modified version  
381 of XRNA software<sup>45</sup>, using the pre-existing templates<sup>46</sup> and the manually curated multiple  
382 sequence alignments from the SEREB database<sup>47</sup>. The 3D structures were selected using the  
383 Representative Sets from RNA 3D Hub<sup>48</sup>. The base pair interactions in the 3D structures  
384 available from the PDB<sup>49</sup> have been annotated using the FR3D software<sup>50</sup>. The 2D layouts were  
385 finalised with Adobe Illustrator, and written out as SVG files. The final high quality templates for  
386 both LSU and SSU have been integrated into RiboVision<sup>51</sup> and are available at  
387 <http://apollo.chemistry.gatech.edu/RibosomeGallery>.

## 388 tRNA 2D structure templates

389 Isotype-specific consensus tRNA sequences and 2D structures were generated using R-scape<sup>52</sup>  
390 from the alignments that were used to train and build the corresponding covariance models in  
391 tRNAscan-SE<sup>16</sup>. Alignments for training the domain-specific covariance models were split into  
392 two subsets: 1) type I tRNAs (all except type, and 2) type II tRNAs (leucine, serine in bacteria,  
393 archaea and eukaryotes, and tyrosine in bacteria). The bacterial tRNA alignments were further  
394 filtered to include only one representative tRNA with the same anticodon in each genus due to  
395 the original extra large training set (over 73,000 tRNAs). Consensus sequences and the 2D  
396 structures of type I and II tRNAs for each domain were then generated using R-scape<sup>52</sup> as the  
397 isotype-specific ones. R2R<sup>9</sup> was used for the initial image creation using consensus sequence.  
398 Custom adjustments were then made to convert the positions of the images into typical tRNA  
399 cloverleaf structure orientation. The templates correspond to tRNAscan-SE 2.0 covariance  
400 models that are used to score input sequences against each isotype-specific set and pick the  
401 highest scoring domain/template combination. The pseudogene tRNAs, as identified by  
402 tRNAscan-SE 2.0, are not currently visualised.

## 403 Rfam 2D structure templates

404 For RNA families without a standard, community-accepted 2D structure layout, we adopted the  
405 Rfam consensus 2D structures displayed using the R-scape<sup>52</sup> and R2R<sup>9</sup> software. The R2R  
406 software uses a set of rules that lead to consistent diagrams with the standard position of the 5'  
407 and 3' ends of the sequence. We excluded the lncRNA Rfam families, as well as families that  
408 are better represented by specialised templates (for example, the tRNA Rfam families are  
409 omitted as the GtRNAdb templates are better suited in this case). The 2,675 Rfam templates  
410 represent a wide range of RNA types, including microRNAs, snoRNAs, riboswitches, RNA

411 thermometers, IRES RNA, bacterial sRNAs, leaders, and other RNAs from both genomic and  
412 metagenomic sources.

## 413 Selecting templates using Ribovore

414 The Ribovore software package includes the Infernal software package that implements  
415 methods for covariance model- and profile hidden Markov model (HMM)-based analysis of RNA  
416 sequences<sup>15</sup>. Ribovore's role in R2DT is to determine the best-matching template model for  
417 each input sequence and to validate that the similarity between the sequence and its best-  
418 matching model extends across the full length of the sequence. This is achieved by the  
419 `ribotyper.pl` script of the Ribovore package which executes two rounds of Infernal's `cmsearch`  
420 program. The first round identifies the best-matching model for each sequence by running  
421 `cmsearch` with command-line options "`--F1 0.02 --doF1b --F1b 0.02 --F2 0.001 --F3 0.00001 --`  
422 `trmF3 --nohmmonly --notrunc --noali`". These options run `cmsearch` in an accelerated mode that  
423 computes sequence-only based scores using a profile HMM (ignoring 2D structure), by  
424 executing only the first three stages of the HMMER3 profile HMM filter pipeline<sup>53,54</sup>. These first  
425 three stages efficiently compute the score of each sequence, but not model alignment boundary  
426 positions or accurate sequence alignment boundary positions but these are irrelevant at this  
427 step. The model that gives the highest score is selected as the best-scoring template model.  
428 Each sequence's best-matching model is used in the second round of `cmsearch`, executed with  
429 the "`--hmmonly`" option, that again uses a profile HMM to score sequence only, but this time  
430 executing the full HMMER3 filter pipeline such that accurate hit boundaries in sequence and  
431 model coordinates are reported. While the second round of `cmsearch` is slower per  
432 model/sequence comparison than the first, only one model is compared to each sequence  
433 instead of all models. If the second `cmsearch` round identifies that there are multiple hits to the  
434 model, this indicates that at least some of the input sequence (the intervening sequence



435 between adjacent hits) is either inserted relative to the model, or dissimilar from the expected  
436 homologous model region. In this case, the sequence is not evaluated further and no structure  
437 diagram will be drawn for the sequence.

438 Typically, profile HMMs and covariance models are built from multiple sequence alignments, but  
439 the SSU and LSU rRNA models used in R2DT were built from the single sequence templates.  
440 R2DT uses the Rfam covariance models built from the Rfam seed alignments. If, for a given  
441 sequence, the first round of ribotyper.pl cmsearch results in zero models with a score above 20  
442 bits indicating that no significant similarity has been detected to any models, then the second  
443 cmsearch round is skipped and the sequence will be analyzed in a subsequent step by  
444 tRNAscan-SE 2.0 to identify possible similarity against the tRNA models.

## 445 Visualising 2D structures using Traveler

446 To produce a layout for an input (target) structure, the Traveler software<sup>17</sup> requires the target  
447 and template 2D structures accompanied by the template layout. Both the target and template  
448 structures are turned into a tree-based representation, then, a minimum mapping between the  
449 trees is found and the template layout is modified based on this mapping to fit the target  
450 structure. To support the R2DT pipeline, two major modifications were made to the Traveler  
451 software: i) the ability to provide custom mapping and ii) optimised hairpin rotation.  
452 Since the target 2D structure is generated by Infernal within the R2DT pipeline, the target-  
453 template structure mapping is already known and the original Traveler's mapping procedure is  
454 not needed. Therefore, for the purpose of R2DT, a new process was implemented that uses the  
455 Infernal output with the target-template sequence mapping and produces an Infernal-informed  
456 tree mapping which is used by Traveler.

457

458 Although in most cases the resulting layout is overlap-free, sometimes the target and template  
459 differ in such a way that it is not easily possible to fit the target-specific portions of the structure  
460 into the template. Therefore, a new overlap detection process was implemented in Traveler  
461 allowing to rotate the overlapping parts of the structure so that the number of overlaps is  
462 minimized. Specifically, Traveler detects the hairpin segments and checks intersection with the  
463 rest of the structure. In the case of non-empty overlap, all 30° rotations of the hairpin are tested  
464 and the one with the lowest number of overlaps is accepted. As rotations of a single hairpin can  
465 open space for further improvements, the process is repeated several times to further decrease  
466 the number of overlaps.

## 467 Pipeline implementation

468 The R2DT software is implemented in Python and is packaged using containers to create pre-  
469 configured, reproducible environments that support Docker and Singularity platforms. The  
470 software has been deployed within the EMBL-EBI Job Dispatcher framework<sup>55</sup> that provides a  
471 web API for submitting jobs and retrieving the results  
472 (<https://www.ebi.ac.uk/Tools/common/tools/help>). The results are visualised with a reusable web  
473 component implemented in React that can be embedded into any website  
474 (<https://github.com/RNAcentral/r2dt-web>).

## 475 Data availability

476 The set of precomputed RNAcentral 2D structures are available at <https://rnacentral.org>. The  
477 diagrams are continuously updated as new templates are developed or algorithm improvements  
478 are made.

## 479 Code availability

480 The R2DT source code is available on GitHub under the Apache 2.0 License

481 (<https://github.com/rnacentral/R2DT>). An R2DT web server can be found at

482 <https://rnacentral.org/r2dt> and its source code is available at <https://github.com/RNAcentral/r2dt->

483 [web](#). A custom version of XRNA-GT is available at <https://github.com/LDWLab/XRNA-GT>.

## 484 Acknowledgements

485 The authors would like to thank the RNAcentral Consortium for contributing data to RNAcentral

486 as well as the organisers of the 2018 Benasque RNA meeting where this project originated. This

487 work was supported by Biotechnology and Biological Sciences Research Council (BBSRC)

488 [BB/N019199/1], Wellcome [218302/Z/19/Z], and by the Intramural Research Program of the

489 National Library of Medicine at the NIH. This work was supported by NASA [80NSSC18K1139]

490 (LDW and ASP). Funding for open access charge: Research Councils UK (RCUK).

## 491 Author contributions

492 BAS generated the diagrams for RNAcentral sequences, performed validation, contributed

493 code, and wrote the manuscript. DH adapted the Traveler software to the needs of the project

494 and wrote the manuscript. EPN contributed code, helped with the Ribovore and Infernal

495 software, and wrote the manuscript. CER developed the R2DT web server. FM implemented the

496 R2DT API. JJC and RG provided the covariation-based SSU and 5S templates. ASP produced

497 the 3D-structure based LSU and SSU templates. AM produced the LSU templates. CM revised

498 the XRNA-GT code and produced the LSU templates. ASP and LDW coordinated the Georgia

499 Tech team and wrote the manuscript. PC and TL produced the tRNA templates, helped with the

500 tRNAscan-SE 2.0 software, and wrote the manuscript. RDF coordinated the project and wrote  
501 the manuscript. AIP conceived and implemented the R2DT software, wrote the manuscript, and  
502 coordinated the project.

## 503 Competing interests

504 The authors declare no competing interests.

## 505 References

- 506 1. Westhof, E., Masquida, B. & Jossinet, F. Predicting and modeling RNA architecture. *Cold*  
507 *Spring Harb. Perspect. Biol.* **3**, (2011).
- 508 2. Cannone, J. J. *et al.* The Comparative RNA Web (CRW) Site: an online database of  
509 comparative sequence and structure information for ribosomal, intron, and other RNAs.  
510 *BMC Bioinformatics* **3**, 1–31 (2002).
- 511 3. Holley, R. W. *et al.* STRUCTURE OF A RIBONUCLEIC ACID. *Science* **147**, 1462–1465  
512 (1965).
- 513 4. Darty, K., Denise, A. & Ponty, Y. VARNA: Interactive drawing and editing of the RNA  
514 secondary structure. *Bioinformatics* **25**, 1974–1975 (2009).
- 515 5. Kerpedjiev, P., Hammer, S. & Hofacker, I. L. Forna (force-directed RNA): Simple and  
516 effective online RNA secondary structure diagrams. *Bioinformatics* **31**, 3377–3379 (2015).
- 517 6. Yang, H. *et al.* Tools for the automatic identification and classification of RNA base pairs.  
518 *Nucleic Acids Res.* **31**, 3450–3460 (2003).
- 519 7. Lu, X.-J. & Olson, W. K. 3DNA: a software package for the analysis, rebuilding and  
520 visualization of three-dimensional nucleic acid structures. *Nucleic Acids Res.* **31**, 5108–  
521 5121 (2003).

- 522 8. Byun, Y. & Han, K. PseudoViewer: web application and web service for visualizing RNA  
523 pseudoknots and secondary structures. *Nucleic Acids Res.* **34**, W416–22 (2006).
- 524 9. Weinberg, Z. & Breaker, R. R. R2R--software to speed the depiction of aesthetic consensus  
525 RNA secondary structures. *BMC Bioinformatics* **12**, 3 (2011).
- 526 10. Johnson, P. Z., Kasprzak, W. K., Shapiro, B. A. & Simon, A. E. RNA2Drawer: geometrically  
527 strict drawing of nucleic acid structures with graphical structure editing and highlighting of  
528 complementary subsequences. *RNA Biol.* **16**, 1667–1671 (2019).
- 529 11. Bellaousov, S., Reuter, J. S., Seetin, M. G. & Mathews, D. H. RNAstructure: Web servers  
530 for RNA secondary structure prediction and analysis. *Nucleic Acids Res.* **41**, W471–4  
531 (2013).
- 532 12. Zuker, M. Mfold web server for nucleic acid folding and hybridization prediction. *Nucleic*  
533 *Acids Res.* **31**, 3406–3415 (2003).
- 534 13. Nawrocki, E. Structural RNA homology search and alignment using covariance models.  
535 (2009).
- 536 14. The RNAcentral Consortium. RNAcentral: a hub of information for non-coding RNA  
537 sequences. *Nucleic Acids Res.* **47**, D221–D229 (2019).
- 538 15. Nawrocki, E. P. & Eddy, S. R. Infernal 1.1: 100-fold faster RNA homology searches.  
539 *Bioinformatics* **29**, 2933–2935 (2013).
- 540 16. Chan, P. P., Lin, B. Y., Mak, A. J. & Lowe, T. M. tRNAscan-SE 2.0: Improved Detection and  
541 Functional Classification of Transfer RNA Genes. doi:10.1101/614032.
- 542 17. Elias, R. & Hoksza, D. TRAVeLer: a tool for template-based RNA secondary structure  
543 visualization. *BMC Bioinformatics* **18**, 487 (2017).
- 544 18. Sprinzl, M., Horn, C., Brown, M., loudovitch, A. & Steinberg, S. Compilation of tRNA  
545 sequences and sequences of tRNA genes. *Nucleic Acids Res.* **26**, 148–153 (1998).
- 546 19. Lee, J. C. & Gutell, R. R. A comparison of the crystal structures of eukaryotic and bacterial  
547 SSU ribosomal RNAs reveals common structural features in the hypervariable regions.

- 548 *PLoS One* **7**, e38203 (2012).
- 549 20. Petrov, A. S. *et al.* Secondary structure and domain architecture of the 23S and 5S rRNAs.  
550 *Nucleic Acids Res.* **41**, 7522–7535 (2013).
- 551 21. Leontis, N. B. & Westhof, E. A common motif organizes the structure of multi-helix loops in  
552 16 S and 23 S ribosomal RNAs. *J. Mol. Biol.* **283**, 571–583 (1998).
- 553 22. Haselman, T., Gutell, R. R., Jurka, J. & Fox, G. E. Additional Watson-Crick interactions  
554 suggest a structural core in large subunit ribosomal RNA. *J. Biomol. Struct. Dyn.* **7**, 181–  
555 186 (1989).
- 556 23. Noller, H. F. *et al.* Secondary structure model for 23S ribosomal RNA. *Nucleic Acids Res.* **9**,  
557 6167–6189 (1981).
- 558 24. Ban, N., Nissen, P., Hansen, J., Moore, P. B. & Steitz, T. A. The complete atomic structure  
559 of the large ribosomal subunit at 2.4 Å resolution. *Science* **289**, 905–920 (2000).
- 560 25. Gutell, R. R. Evolutionary Characteristics of 16S and 23S rRNA Structures. in (ed. Hyman  
561 Hartman, K. M.) 243–309 (World Scientific Publishing Co., 1992).
- 562 26. Gerbi, S. A. Expansion segments: regions of variable size that interrupt the universal core  
563 secondary structure of ribosomal RNA. *Ribosomal RNA—Structure, evolution, processing,*  
564 *and function in protein synthesis* 71–87 (1996).
- 565 27. Giegé, R., Sissler, M. & Florentz, C. Universal rules and idiosyncratic features in tRNA  
566 identity. *Nucleic Acids Res.* **26**, 5017–5035 (1998).
- 567 28. Brennan, T. & Sundaralingam, M. Structure, of transfer RNA molecules containing the long  
568 variable loop. *Nucleic Acids Res.* **3**, 3235–3252 (1976).
- 569 29. Baron, C., Westhof, E., Böck, A. & Giegé, R. Solution structure of selenocysteine-inserting  
570 tRNA(Sec) from *Escherichia coli*. Comparison with canonical tRNA(Ser). *J. Mol. Biol.* **231**,  
571 274–292 (1993).
- 572 30. Hubert, N., Sturchler, C., Westhof, E., Carbon, P. & Krol, A. The 9/4 secondary structure of  
573 eukaryotic selenocysteine tRNA: more pieces of evidence. *RNA* **4**, 1029–1033 (1998).

- 574 31. XRNA. <http://rna.ucsc.edu/rnacenter/xrna/xrna.html>.
- 575 32. Jelínek, J. *et al.* rPredictorDB: a predictive database of individual secondary structures of  
576 RNAs and their formatted plots. *Database* **2019**, (2019).
- 577 33. O’Leary, N. A. *et al.* Reference sequence (RefSeq) database at NCBI: current status,  
578 taxonomic expansion, and functional annotation. *Nucleic Acids Res.* **44**, D733–45 (2016).
- 579 34. Basu, S. *et al.* DictyBase 2013: integrating multiple Dictyostelid species. *Nucleic Acids Res.*  
580 **41**, D676–83 (2013).
- 581 35. Thurmond, J. *et al.* FlyBase 2.0: the next generation. *Nucleic Acids Res.* **47**, D759–D765  
582 (2019).
- 583 36. Smith, C. L. *et al.* Mouse Genome Database (MGD)-2018: knowledgebase for the  
584 laboratory mouse. *Nucleic Acids Res.* **46**, D836–D842 (2018).
- 585 37. McDowall, M. D. *et al.* PomBase 2015: updates to the fission yeast database. *Nucleic Acids*  
586 *Res.* **43**, D656–61 (2015).
- 587 38. Cherry, J. M. *et al.* Saccharomyces Genome Database: the genomics resource of budding  
588 yeast. *Nucleic Acids Res.* **40**, D700–5 (2012).
- 589 39. Berardini, T. Z. *et al.* The Arabidopsis information resource: Making and mining the ‘gold  
590 standard’ annotated reference plant genome. *Genesis* **53**, 474–485 (2015).
- 591 40. Yook, K. *et al.* WormBase 2012: more genomes, more data, new website. *Nucleic Acids*  
592 *Res.* **40**, D735–41 (2012).
- 593 41. Yates, B. *et al.* Genenames.org: the HGNC and VGNC resources in 2017. *Nucleic Acids*  
594 *Res.* **45**, D619–D625 (2017).
- 595 42. Keseler, I. M. *et al.* The EcoCyc database: reflecting new knowledge about Escherichia coli  
596 K-12. *Nucleic Acids Res.* **45**, D543–D550 (2017).
- 597 43. Hufsky, F. *et al.* Computational Strategies to Combat COVID-19: Useful Tools to Accelerate  
598 SARS-CoV-2 and Coronavirus Research. (2020).
- 599 44. Gutell, R. R., Lee, J. C. & Cannone, J. J. The accuracy of ribosomal RNA comparative

- 600 structure models. *Curr. Opin. Struct. Biol.* **12**, 301–310 (2002).
- 601 45. Weiser, B. & Noller, H. F. XRNA: Auto-interactive program for modeling RNA. *The Center*  
602 *for Molecular Biology of RNA, University of California, Santa Cruz. Internet: ftp://fangio.*  
603 *ucsc.edu/pub/XRNA* (1995).
- 604 46. Petrov, A. S. *et al.* Secondary structures of rRNAs from all three domains of life. *PLoS One*  
605 **9**, e88222 (2014).
- 606 47. Bernier, C. R., Petrov, A. S., Kovacs, N. A., Penev, P. I. & Williams, L. D. Translation: The  
607 Universal Structural Core of Life. *Mol. Biol. Evol.* **35**, 2065–2076 (2018).
- 608 48. Leontis, N. B. & Zirbel, C. L. Nonredundant 3D Structure Datasets for RNA Knowledge  
609 Extraction and Benchmarking. in *RNA 3D Structure Analysis and Prediction* (eds. Leontis,  
610 N. & Westhof, E.) 281–298 (Springer Berlin Heidelberg, 2012).
- 611 49. Berman, H. M. *et al.* The Protein Data Bank. *Acta Crystallogr. D Biol. Crystallogr.* **58**, 899–  
612 907 (2002).
- 613 50. Sarver, M., Zirbel, C. L., Stombaugh, J., Mokdad, A. & Leontis, N. B. FR3D: finding local  
614 and composite recurrent structural motifs in RNA 3D structures. *J. Math. Biol.* **56**, 215–252  
615 (2008).
- 616 51. Bernier, C. R. *et al.* RiboVision suite for visualization and analysis of ribosomes. *Faraday*  
617 *Discuss.* **169**, 195–207 (2014).
- 618 52. Rivas, E., Clements, J. & Eddy, S. R. A statistical test for conserved RNA structure shows  
619 lack of evidence for structure in lncRNAs. *Nat. Methods* **14**, 45–48 (2017).
- 620 53. Eddy, S. R. Accelerated Profile HMM Searches. *PLoS Comput. Biol.* **7**, e1002195 (2011).
- 621 54. Wheeler, T. J. & Eddy, S. R. nhmmer: DNA homology search with profile HMMs.  
622 *Bioinformatics* **29**, 2487–2489 (2013).
- 623 55. Madeira, F. *et al.* The EMBL-EBI search and sequence analysis tools APIs in 2019. *Nucleic*  
624 *Acids Res.* **47**, W636–W641 (2019).
